# Supplementary material
Source: publisher figshare collection journal article supplement (https://tandf.figshare.com/ndownloader/files/21715638)
Supplement: Supplementary file 1 [file 21715638]

Supplemental Material

Title of Paper: Improving Radon Awareness and Risk Reduction Efforts in a Hispanic Community: An Assessment of Communication and Cultural Challenges

Authors: Chrysan Cronin, MS, MPH, DrPH, Michael Trush, PhD, William Bellamy, BA, Paul Locke, MPH, JD, DrPH, and James Russell, PhD

**Survey Questionnaire**

Do you live in Allentown? If Yes, continue. If No, do not continue.
Are you at least 18 years of age? If Yes, continue. If No, do not continue.

1. Have you ever heard of radon?

☐ Yes (Skip to Question #2)

☐ No (Skip to Question #11)

2. Where have you heard about **RADON**? (Choose ALL that apply)

☐ TV commercial

☐ Radio commercial

☐ TV program/news

☐ Radio program/newsIRB

☐ Newspaper/Magazine

☐ Internet

☐ My Doctor

☐ Family/Friend

☐ A realtor

☐ Other____________________

3. Which of the following statements about RADON is true? (check all that apply)
 ☐ It is an invisible gas that can become trapped inside your home.
 ☐ There is nothing that can be done to remove radon from your home.
 ☐ You live in an area where indoor radon levels are typically very high.
 ☐ Breathing in radon gas can cause lung cancer.

4. How aware are you of the health problems that can be associated with high **RADON** levels in your home?

☐ Not aware of any associated health problems

☐ Somewhat aware of associated health problems

☐ Fully aware of associated health problems

5. How concerned are you about the health problems caused by **RADON** exposure?

☐ Not concerned

☐ Somewhat concerned

☐ Very concerned

6. Have you or someone else ever tested your current residence for **RADON**?

☐ Yes (Continue to Question #7)

☐ No (skip to Question #10)

☐ I don’t know (skip to Question #10)

7. If you answered YES to #6, was the RADON level in your home found to be higher than recommended?
 ☐ Yes it was higher than recommended (Continue to #8)
 ☐ No it was not higher than recommended (Continue to #11)
 ☐ I don’t know what the level was (Continue to #11)

8. **If you answered YES to 7**, have you or someone else paid someone to install a **RADON** pump in your home?

☐ Yes (Continue to #11)

☐ No (Continue to #9)

☐ I don’t know (Continue to #11)

9. **If you answered NO to #8**, why wasn’t a **RADON** pump installed? (Choose ALL that apply)

☐ It is too expensive

☐ You do not know how to have a radon pump installed

☐ You do not own your home

☐ You do not believe that radon is a health threat to you or to your family.

☐ You found other ways to take care of the problem

☐ There was already a pump installed when you moved in

☐ You don’t know.

☐ Other:_________________________________________

10. **If you answered NO or I don’t know to #6,** why have you not tested your home for **RADON**? (choose all that apply)
☐ You do not know how to test for radon.

☐ You do not believe that radon is a health threat to you or to your family.

☐ Testing is too expensive.

☐ You do not own your own home

. ☐ There is already a radon pump in your home

☐ You don’t know.

☐ Other:________________________

************************************************************************************
11. Are you?

☐ Male

☐ Female

☐ Refused

12. Is your age between?

☐ 18 and 35

☐ 36 and 50

☐ 51 and 65

☐ Over 65

13. What is your highest level of education?
 ☐ Less than high school
 ☐ High School graduate

☐ 2-4 years of college

☐ Refused

14. Are you of Hispanic/Latino or Spanish origin?

☐ Yes

☐ No

☐ Refused

15. What language do you most often speak at home?
 ☐ Spanish
 ☐ English
 ☐ Other__________________

16. What zip code do you live in?

☐ 18101

☐ 18102

☐ 18103

☐ 18104

☐ Other:________________

17. What type of housing do you live in?
 ☐ Apartment/Rental
 ☐ House/Rental
 ☐ House/Owner
 ☐ Condo/Owner
 ☐ Condo/Rental
 ☐ Other____________________________

18. How many years have you lived at your current address?
 ☐ Less than 5
 ☐ 5-10
 ☐ 11-15
 ☐ 16-20
 ☐ more than 20

19. How many years have you lived in Allentown?
 ☐ Less than 5
 ☐ 5-10
 ☐ 11-15
 ☐ 16-20
 ☐ more than 20

20. How many children under 18 live in your home?
 ☐ 0
 ☐ 1
 ☐ 2
 ☐ 3
 ☐ 4
 ☐ 5
 ☐ more than 5
 ☐ Refuse

21. Including yourself, how many adults, aged 18 and over, live in your home?

☐ 1

☐ 2

☐ 3

☐ 4

☐ 5

☐ More than 5

22. Which best describes the total combined annual household income?

☐ Less than $10,000 per year
 ☐ $10,000 to less than 25,000 per year
 ☐ $25,000 to less than 50,000 per year
 ☐ $50,000 to less than 75,000 per year
 ☐ Over $75,000
 ☐ Refuse

23. The most recent time you looked for information about health or medical topics, where did you look first? (Choose only one).

☐ Books

☐ Brochures/Pamphlets

☐ Public Health Organization (such as the Allentown Health Bureau)
 ☐ Doctor or health care provider
 ☐ Internet
 ☐ Newspaper
 ☐ Magazine
 ☐ TV
 ☐ Radio

☐ Family/Friends
 ☐ Church
 ☐ I don’t look for health information
 ☐ Other________________

24. Have you smoked at least 100 cigarettes (tobacco) in your entire life?

☐ Yes

☐ No

☐ Don’t know

☐ Refused

25. Do you now smoke (tobacco) everyday, some days, or not at all?

☐ Every day

☐ Some days

☐ Not at all

☐ Refused

26. Do you currently live with smokers (tobacco)?

☐ Yes

☐ No

☐ Refused

27. In the past 12 months, how many times have you visited a doctor or other health care professional?

☐ Never

☐ Once

☐ More than once

☐ Refused

28. Has a doctor ever discussed the health effects of LEAD poisoning with you?

☐ Yes
 ☐ No
 ☐ Don’t know
 ☐ Refused

29. If you have taken a child under the age of 5 to a doctor in the past 12 months, has the doctor ever discussed the health effects of LEAD poisoning on children with you during that visit?

☐ Yes

☐ No

☐ I have not taken any children to the doctor in the past 12 months
 ☐ Don’t know

☐ Refused

Thank you for completing this survey.
